# Supplementary material for: HRP-2 determines HIV-1 integration site selection in LEDGF/p75 depleted cells
Source: PubMed Central journal article supplement (PMC3485173; doi:10.1186/1742-4690-9-84), 2012-10-09

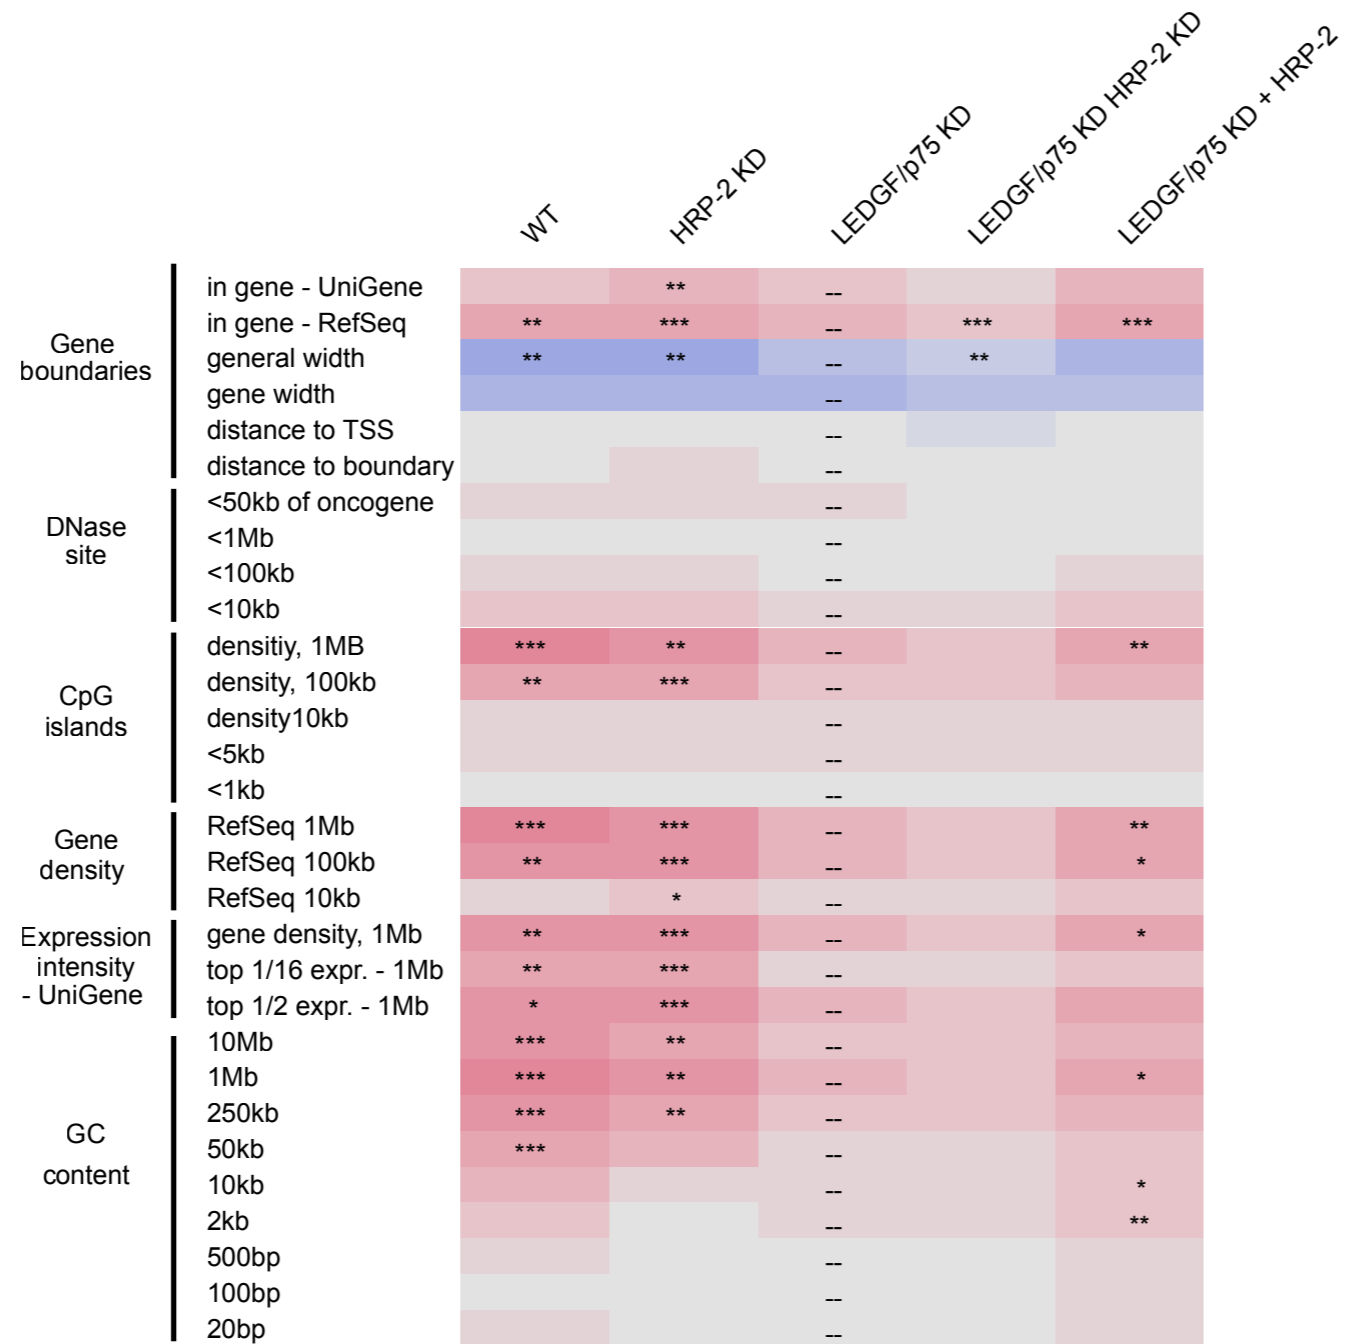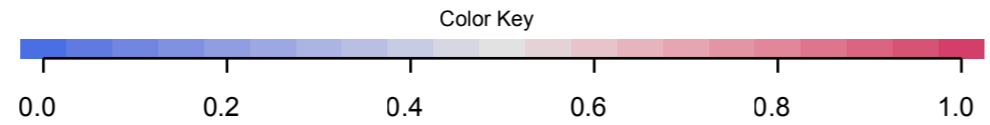

Supplement: 1742-4690-9-84-S2.pdf [file 1742-4690-9-84-S2.pdf]
